# Supplementary material for: Comparative Transcriptomic and Proteomic Analyses Identify Key Genes Associated With Milk Fat Traits in Chinese Holstein Cows
Source: Front Genet. 2019 Aug 13;10:672. doi: 10.3389/fgene.2019.00672 (PMC6700372; doi:10.3389/fgene.2019.00672)
Supplement: Supplementary file 9 [file Table_2.xlsx]

## Sheet: Sheet1
Table S2. Summary of sequence reads alignment to the bovine reference genome
Sample-ID	Total Reads	Mapped Reads	Uniq Mapped Reads	Multiple Map Reads	Reads Map to '+'	Reads Map to '-'
HP1	69808390	65,736,252 (94.17%)	63,353,550 (90.75%)	2,382,702 (3.41%)	32,636,619 (46.75%)	32,779,654 (46.96%)
HP2	71969006	67,560,581 (93.87%)	65,356,650 (90.81%)	2,203,931 (3.06%)	33,591,630 (46.68%)	33,710,302 (46.84%)
HP3	60903342	57,788,649 (94.89%)	55,449,778 (91.05%)	2,338,871 (3.84%)	28,695,876 (47.12%)	28,809,998 (47.30%)
LP1	57837412	55,046,972 (95.18%)	53,270,994 (92.10%)	1,775,978 (3.07%)	27,377,704 (47.34%)	27,463,575 (47.48%)
LP2	69390856	66,138,585 (95.31%)	63,905,840 (92.10%)	2,232,745 (3.22%)	32,906,807 (47.42%)	33,007,772 (47.57%)
LP3	64808124	61,485,265 (94.87%)	59,440,338 (91.72%)	2,044,927 (3.16%)	30,582,519 (47.19%)	30,665,973 (47.32%)
